# Supplementary material
Source: MDPI journal article supplement (https://www.mdpi.com/2073-4352/7/5/140)
Supplement: s1 [file s1]

Dear Editor

For the manuscript you changed information we did some adjustments follow lists:

1. We changed the place of the co-authors Meiqi Zheng and Mengqing Zhou;
2. We added the affiliations of Zhaoxia Zhang and changed the E-mails of some co-authors;
3. We changed the affiliations of authors;
4. We changed the "...structure" to "crystal structure";
5. We added the header of the table;
6. We changed the "(a) Form I ..." to "(a) Form I, Form II and Form III, (b) Form IV and Form V";
7. We changed the header of the table;
8. We changed the "other ..." to "other crystals forms";
9. We added the city and county of the instrument;
10. We added "doi" in the journal and the "ISBN" in the book.

Thank you very much for your considering our manuscript for potential publication. I'm looking forward to hearing from you soon.

Sincerely yours,  
Guoqing Zhang

Zhejiang Sci-Tech University, Hangzhou 310018, P.R. China

Tel.: +86-571-86843588.

E-mail address: zgq@zstu.edu.cn.
